# Supplementary material for: Fear of Death in Medical Students from a Peruvian University during the COVID-19 Pandemic
Source: MDPI journal article supplement (doi:10.3390/bs12050142), 2022-05-13
Supplement: s1 [file s1]

## Supplementary Materials

**Table S1.** The number of students enrolled by year of study.

| Year of study | Number of students<br>enrolled | Number of students<br>included in the study<br><i>n</i> (%) |
|---------------|--------------------------------|-------------------------------------------------------------|
| First year    | 90                             | 45 (50.0)                                                   |
| Second year   | 86                             | 46 (53.5)                                                   |
| Third year    | 52                             | 46 (88.5)                                                   |
| Fourth year   | 59                             | 39 (66.1)                                                   |
| Fifth year    | 55                             | 37 (67.3)                                                   |
| Sixth year    | 66                             | 47 (71.2)                                                   |
| Seventh year  | 53                             | 24 (45.3)                                                   |
| Total         | 461                            | 284 (61.6)                                                  |
